# Supplementary material
Source: publisher figshare collection journal article supplement (https://acs.figshare.com/ndownloader/files/4457707)
Supplement: Supplementary file 1 [file 4457707]

## Supplementary Figure 1.

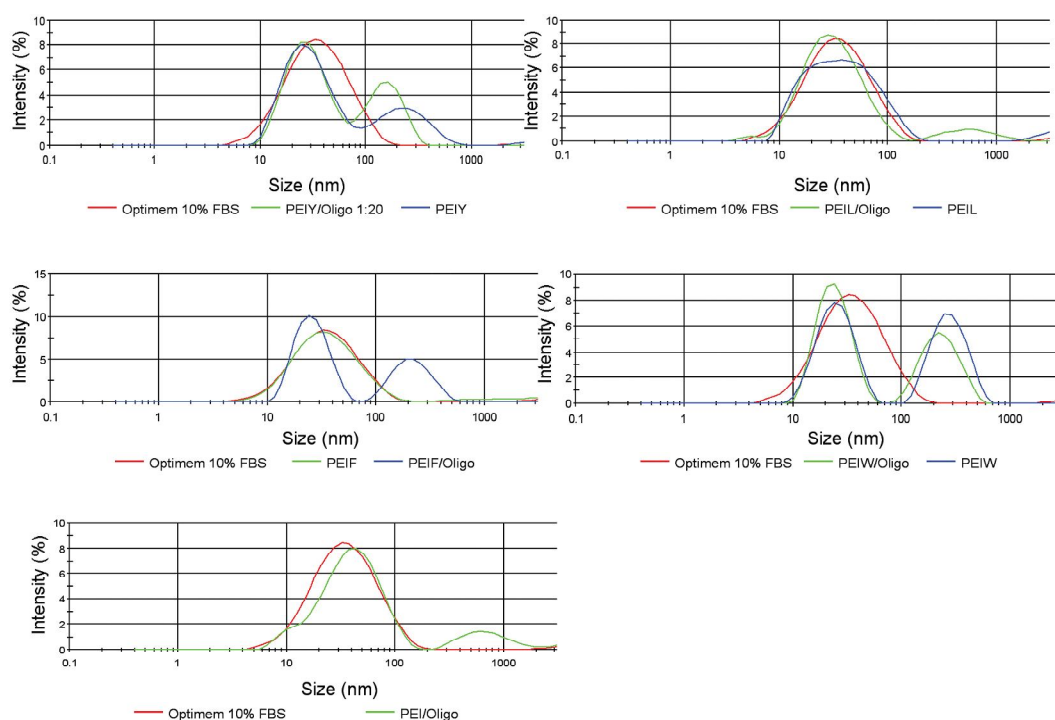

**Assessment of particles size by dynamic light scatter (DLS).** To verify the distribution of protein particles and aggregates, DLS studies were conducted in serum-containing medium. Particles were formulated in OptiMEM serum free medium at the N/P ratio of 20:1. After 30 min incubation at RT, oligo polyplexes were diluted in 10% serum-enrich OptiMEM medium and the size distribution according to intensity was measured. All modified-PEI were analyzed for the formation of nanoparticles in presence and absence of splice-correcting oligos. The background particle-distribution in medium with 10% FBS was included with all samples studied, and presence of polyplexes or polymer particles were detected by appearance of a new population or disturbance of this one.
